# Supplementary material
Source: HighWire-hosted journal article supplement (https://www.cmajopen.ca/highwire/filestream/80962/field_highwire_adjunct_files/1/2016-0084-2-at.pdf)
Supplement: 2016-0084-2-at.pdf [file 2016-0084-2-at.pdf]

**Appendix 2 (as supplied by the authors): Literature search strategies**

**Search strategy for Ovid MEDLINE® 1946-present and Ovid MEDLINE® In-Process & Other Non-Indexed Citations; run on 2016-MAY-06, yielding 1,213 results.**

| #  | Search                                                                                                                                                                 |
|----|------------------------------------------------------------------------------------------------------------------------------------------------------------------------|
| 1  | Hepatitis C/ or Hepatitis C, Chronic/ or Hepacivirus/ or Hepatitis C Antibodies/ or exp Hepatitis C Antigens/                                                          |
| 2  | (hepatitis C or hepC or hep C or hepacivirus or HCV).ti,ab,kf                                                                                                          |
| 3  | 1 or 2                                                                                                                                                                 |
| 4  | exp Enzyme-Linked Immunosorbent Assay/                                                                                                                                 |
| 5  | (ELISA or EIA or enzyme immunoassa* or enzyme linked immunosorben* or enzyme linked immunoassa* or enzyme linked immuno-sorben* or enzyme linked immunoblot*).ti,ab,kf |
| 6  | ((immunosorb* or immuno-sorb*) adj2 enzyme* adj2 (assay or assays)).ti,ab,kf                                                                                           |
| 7  | (CMIA or CLIA or CIA or MEIA).ti,ab,kf                                                                                                                                 |
| 8  | ((chemilumin* or chemi-lumin*) adj2 (immunoassa* or immuno-assa* or assa*)).ti,ab,kf                                                                                   |
| 9  | ((micropart* or micro-part*) adj2 (immunoassa* or immuno-assa* or assa*)).ti,ab,kf                                                                                     |
| 10 | (Architect or Vitros or ADVIA or Centaur or AxSYM or Monolisa or Murex).ti,ab,kf                                                                                       |
| 11 | 4 or 5 or 6 or 7 or 8 or 9 or 10                                                                                                                                       |
| 12 | 3 and 11                                                                                                                                                               |
| 13 | exp Mass Screening/                                                                                                                                                    |
| 14 | (detect* or screen*).ti,ab,kf                                                                                                                                          |
| 15 | 13 or 14                                                                                                                                                               |
| 16 | 12 and 15                                                                                                                                                              |
| 17 | exp "Sensitivity and Specificity"/ or Diagnostic errors/ or exp False Positive Reactions/ or exp "Predictive Value of Tests"/                                          |
| 18 | (false adj2 (positive* or negative*)).ti,ab,kf                                                                                                                         |
| 19 | (predict* adj2 (positive* or negative*)).ti,ab,kf                                                                                                                      |
| 20 | (sensitiv* or specific*).ti,ab,kf                                                                                                                                      |
| 21 | ((test* or diagnos*) adj2 (performance or accura* or characteristic*)).ti,ab,kf                                                                                        |
| 22 | DTA.ti,ab,kf                                                                                                                                                           |
| 23 | 17 or 18 or 19 or 20 or 21 or 22                                                                                                                                       |
| 24 | 3 and 11 and 15 and 23                                                                                                                                                 |
| 25 | 24 not conference abstract.pt                                                                                                                                          |
| 26 | limit 25 to English language                                                                                                                                           |
| 27 | limit 25 to French                                                                                                                                                     |
| 28 | 26 or 27                                                                                                                                                               |
| 29 | limit 28 to yr="1990-current"                                                                                                                                          |
| 30 | remove duplicates from 29                                                                                                                                              |

Search strategy for EMBASE®; run on 2016-MAY-06, yielding 1,315 results.

| #  | Search                                                                                                                                                                       |
|----|------------------------------------------------------------------------------------------------------------------------------------------------------------------------------|
| 1  | exp hepatitis C/ or exp Hepatitis C virus/ or exp hepatitis C antibody/ or exp hepatitis C antigen/                                                                          |
| 2  | (hepatitis C or hepC or hep C or hepacivirus or HCV).ti,ab                                                                                                                   |
| 3  | 1 or 2                                                                                                                                                                       |
| 4  | exp enzyme linked immunosorbent assay/ or exp chemiluminescence immunoassay/ or exp microparticle enzyme immunoassay/                                                        |
| 5  | (ELISA or EIA or enzyme immunoassa* or enzyme linked immunosorben* or enzyme linked immunoassa* or enzyme linked immuno-sorben* or enzyme linked immunoblot*).ti,ab          |
| 6  | ((immunosorb* or immuno-sorb*) adj2 enzyme* adj2 (assay or assays)).ti,ab                                                                                                    |
| 7  | (CMIA or CLIA or CIA or MEIA).ti,ab                                                                                                                                          |
| 8  | ((chemilumin* or chemi-lumin*) adj2 (immunoassa* or immuno-assa* or assa*)).ti,ab                                                                                            |
| 9  | ((micropart* or micro-part*) adj2 (immunoassa* or immuno-assa* or assa*)).ti,ab                                                                                              |
| 10 | (Architect or Vitros or ADVIA or Centaur or AxSYM or Monolisa or Murex).ti,ab                                                                                                |
| 11 | 4 or 5 or 6 or 7 or 8 or 9 or 10                                                                                                                                             |
| 12 | 3 and 11                                                                                                                                                                     |
| 13 | exp antibody screening/ or exp mass screening/ or exp screening/ or exp screening test/                                                                                      |
| 14 | (detect* or screen*).ti,ab                                                                                                                                                   |
| 15 | 13 or 14                                                                                                                                                                     |
| 16 | 12 and 15                                                                                                                                                                    |
| 17 | exp diagnostic accuracy/ or exp "sensitivity and specificity"/ or exp diagnostic error/ or exp false positive result/ or exp false negative result/ or exp predictive value/ |
| 18 | (false adj2 (positive* or negative*)).ti,ab                                                                                                                                  |
| 19 | (predict* adj2 (positive* or negative*)).ti,ab                                                                                                                               |
| 20 | (sensitiv* or specific*).ti,ab                                                                                                                                               |
| 21 | ((test* or diagnos*) adj2 (performance or accura* or characteristic*)).ti,ab                                                                                                 |
| 22 | DTA.ti,ab                                                                                                                                                                    |
| 23 | 17 or 18 or 19 or 20 or 21 or 22                                                                                                                                             |
| 24 | 3 and 11 and 15 and 23                                                                                                                                                       |
| 25 | 24 not conference abstract.pt                                                                                                                                                |
| 26 | limit 25 to English language                                                                                                                                                 |
| 27 | limit 25 to French                                                                                                                                                           |
| 28 | 26 or 27                                                                                                                                                                     |
| 29 | limit 28 to yr="1990-current"                                                                                                                                                |
| 30 | remove duplicates from 29                                                                                                                                                    |
